# Supplementary material for: Sea urchin-like architectures and nanowire arrays of cobalt–manganese sulfides for superior electrochemical energy storage performance
Source: Springer Nature journal article supplement (doi:10.1007/s10853-017-1976-7), 2018-01-09
Supplement: MOESM1 [file 15352134]

**Sea-urchin-like architectures and nanowire arrays of cobalt−manganese sulfides for superior electrochemical energy storage performance**

Yuying Zhua, Haichao Chena,b,*, Si Chena, Chao Lia, Meiqiang Fana, and Kangying Shua,*

a*College of Materials Science & Engineering, China Jiliang University (CJLU), Hangzhou 310018, China.*

b*Institute of Materials for Energy and Environment,* *School of Materials Science and Engineering, Qingdao University, Qingdao 266071, China.*

*Corresponding authors. E-mail: chenhchust@126.com (H.-C. Chen), shukangying@cjlu.edu.cn (K.Y. Shu)

**
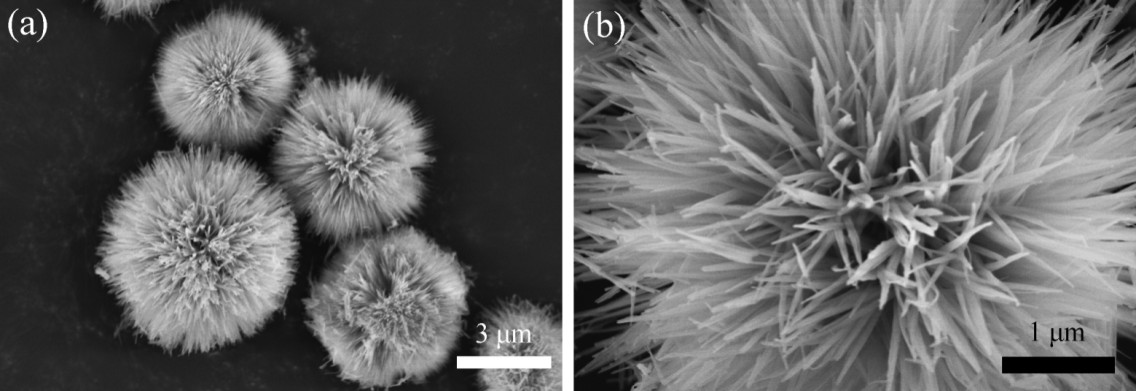
**

**Fig. S1.** SEM images of the Co−Mn precursor


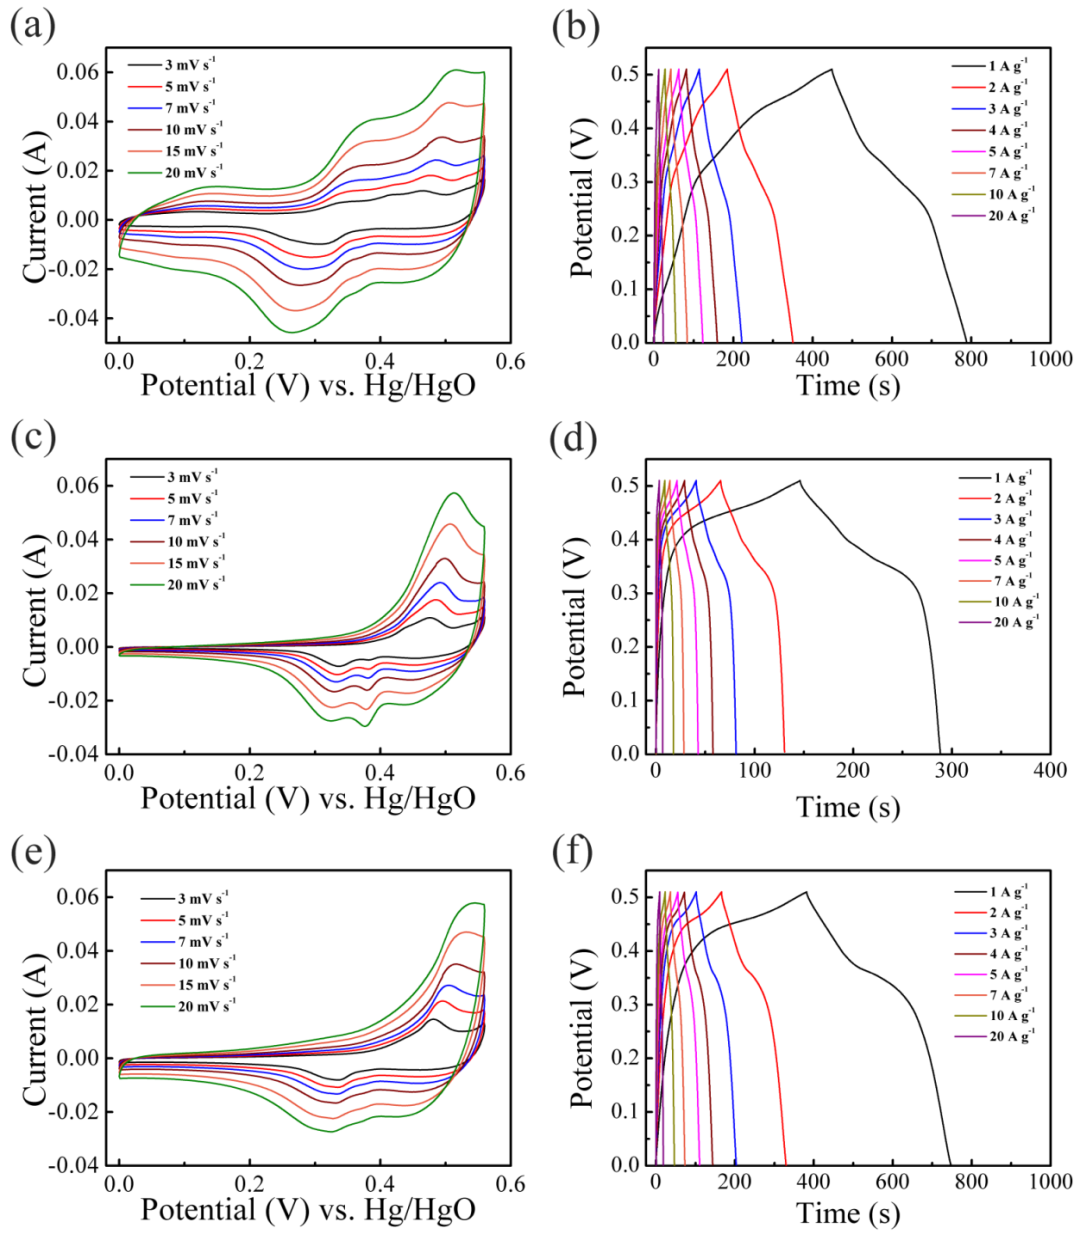


**Fig. S2** Electrochemical tests in a three-electrode system: (a) CV and (b) GCD curves of the sea-urchin-like Co−Mn sulfide at different scan rates and current densities, respectively; (c) CV and (d) GCD curves of the sea-urchin-like Co−Mn oxide at different scan rates and current densities, respectively; (e) CV and (f) GCD curves of Co−Mn oxide arrays on Ni foam at different scan rates and current densities, respectively.


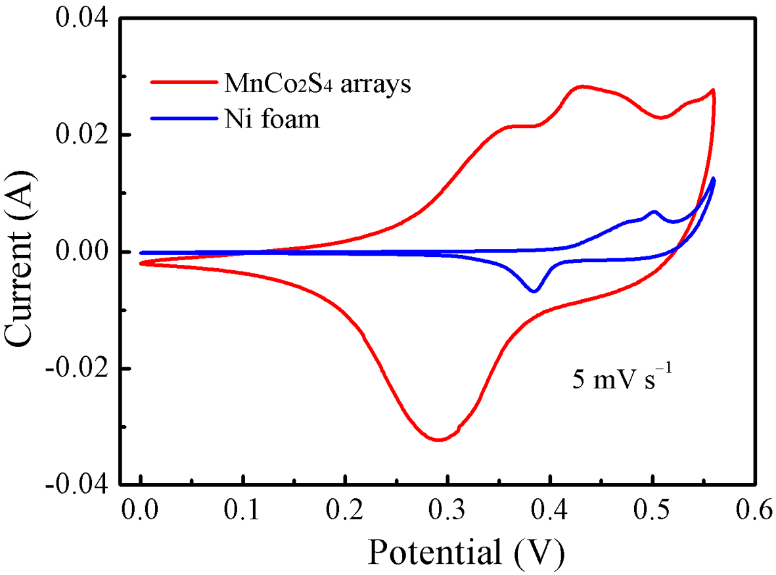


**Fig. S3** CV curves at 5 mV s-1 of Ni foam supported MnCo2S4 array sample and pure Ni foam.
